# Supplementary material
Source: Springer Nature journal article supplement (https://www.springermedizin.de/resource/supplementary/12885_2010_2601_MOESM5_ESM.pdf/9461552)

**A**

|                      |   |   |   |   |   |   |
|----------------------|---|---|---|---|---|---|
| 4hrs treatment       |   |   |   |   |   |   |
| FLLL32(10 $\mu$ M)   | - | - | - | - | + | - |
| Curcumin(10 $\mu$ M) | - | - | - | + | - | - |
| DMSO                 | - | - | + | + | + | - |
| Competitor           | - | + | - | - | - | - |
| STAT3 Ab             | - | - | - | - | - | + |

**OSA8**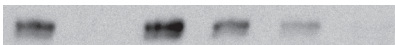**SJSA**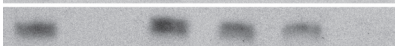**B**

**OSA8**

|  |       |      |                     |                   |
|--|-------|------|---------------------|-------------------|
|  | Media | DMSO | Curcumin 10 $\mu$ M | FLLL32 10 $\mu$ M |
|--|-------|------|---------------------|-------------------|

STAT3

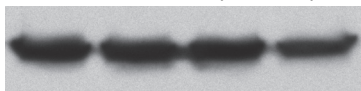 $\beta$ -actin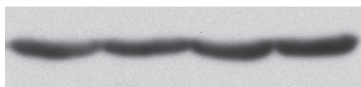**SJSA**

STAT3

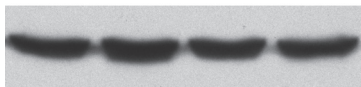 $\beta$ -actin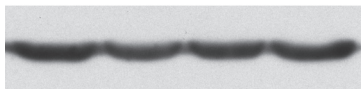

Supplement: MOESM5 [file 9461552]
